# Supplementary material for: Oxaliplatin Analogues with Carboxy Derivatives of Boldine with Enhanced Antioxidant Activity
Source: Hindawi journal article supplement (doi:10.1155/2015/920143), 2015-01-01

**Oxaliplatin analogues with carboxy derivatives of boldine with enhanced antioxidant activity.**

Marco Mellado<sup>a</sup>, Carlos Jara<sup>c</sup>, David Astudillo<sup>b</sup>, Joan Villena<sup>b</sup>, Patricio G. Reveco<sup>a</sup> and Franz A. Thomet<sup>a\*</sup>

<sup>a</sup> Department of Chemistry, Universidad Técnica Federico Santa María, Avenida España N° 1680, Valparaíso, Chile.

<sup>b</sup> School of Medicine, Centro de Investigaciones Biomédicas (CIB), Universidad de Valparaíso, Avenida Hontaneda N° 2664, Valparaíso, Chile.

<sup>c</sup> School of Medicine, Laboratorio de Investigación – Estrés Oxidativo, Universidad de Valparaíso, Avenida Brasil N° 1560, Valparaíso, Chile.

**Contents**

|                                                                                      | Page. No. |
|--------------------------------------------------------------------------------------|-----------|
| 1. Figure 3: <sup>1</sup> H-NMR spectrum of 3-carboxyboldine (L5)                    | 2         |
| 2. Figure 4: <sup>13</sup> C-NMR spectrum of 3-carboxyboldine (L5)                   | 3         |
| 3. Figure 5: <sup>1</sup> H-NMR spectra of [Pt(dach)(L5)] (1) and [Pt(dach)(L6)] (2) | 4         |
| 4. Figure 6: Infrared spectrum of 3-carboxyboldine (L5)                              | 5         |
| 5. Figure 7: Infrared spectrum of [Pt(dach)(L5)] (1)                                 | 5         |

**Figure 3:**  $^1\text{H}$ -NMR spectrum of 3-carboxyboldine (L5) in  $\text{DMSO-d}_6$ .

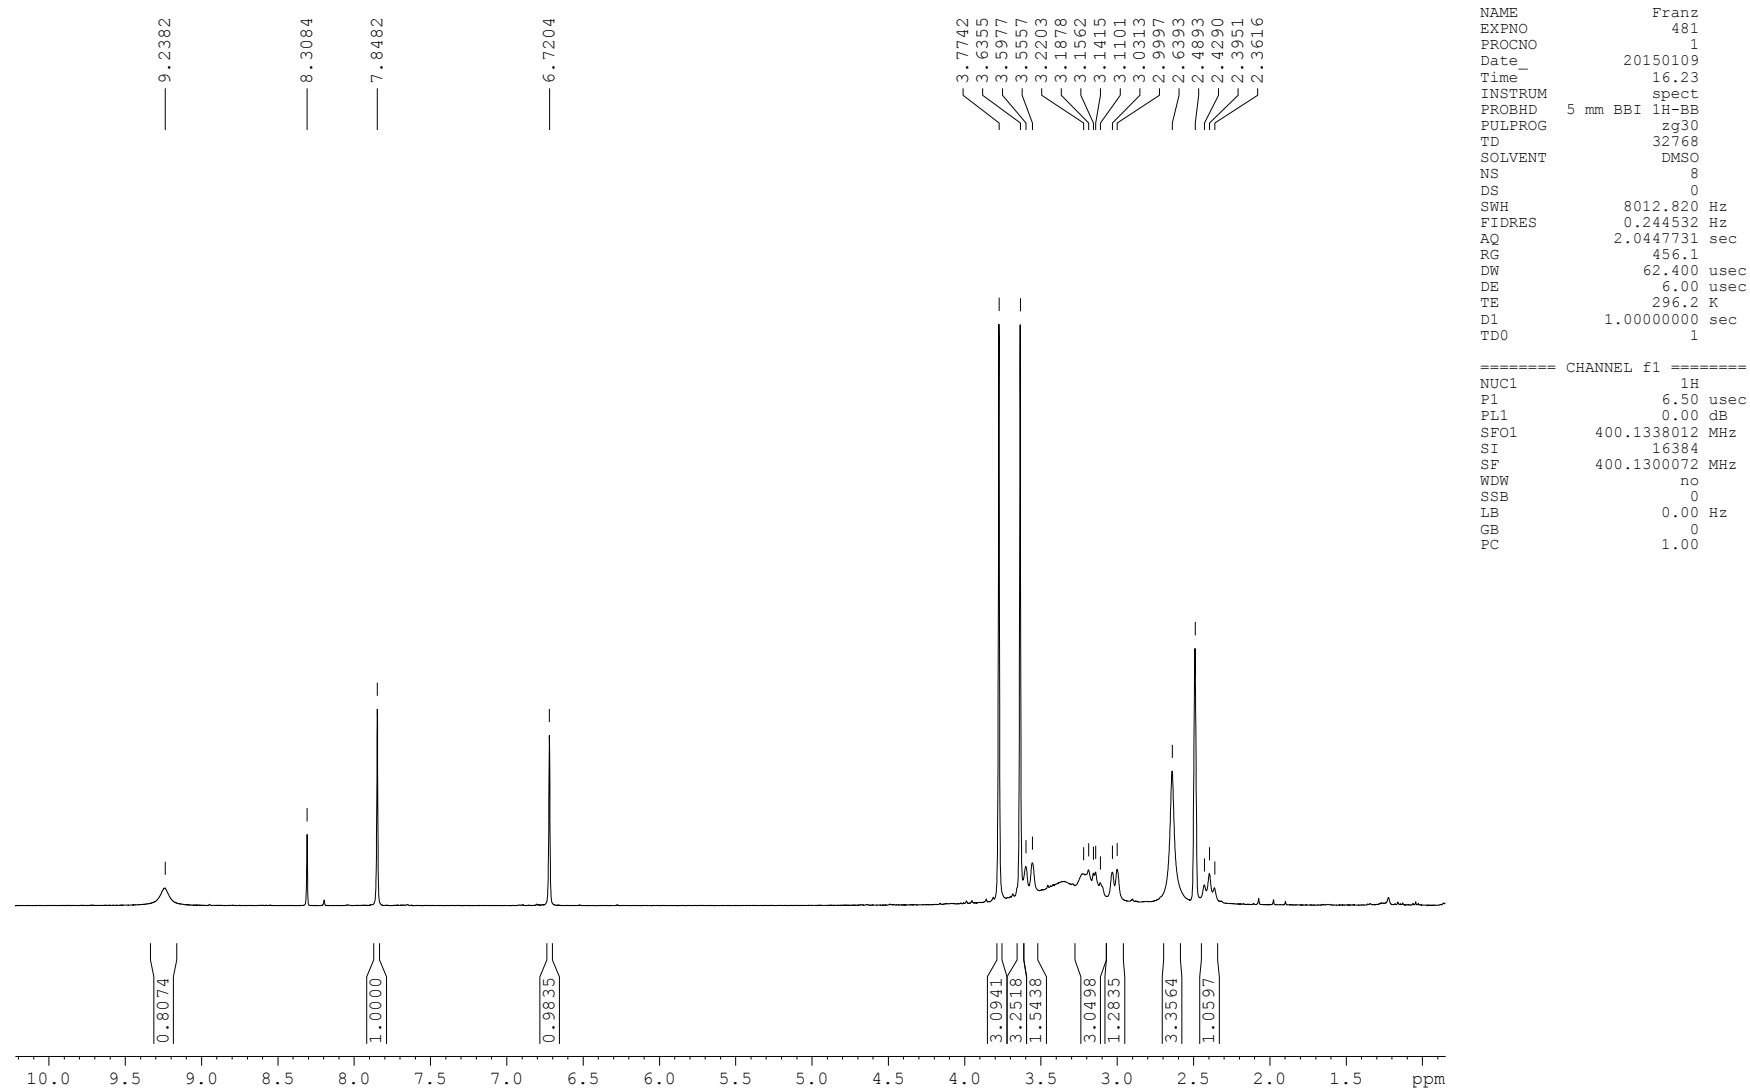

**Figure 4:**  $^{13}\text{C}$ -NMR spectrum of 3-carboxybaldine (L5) in  $\text{DMSO-d}_6$ .

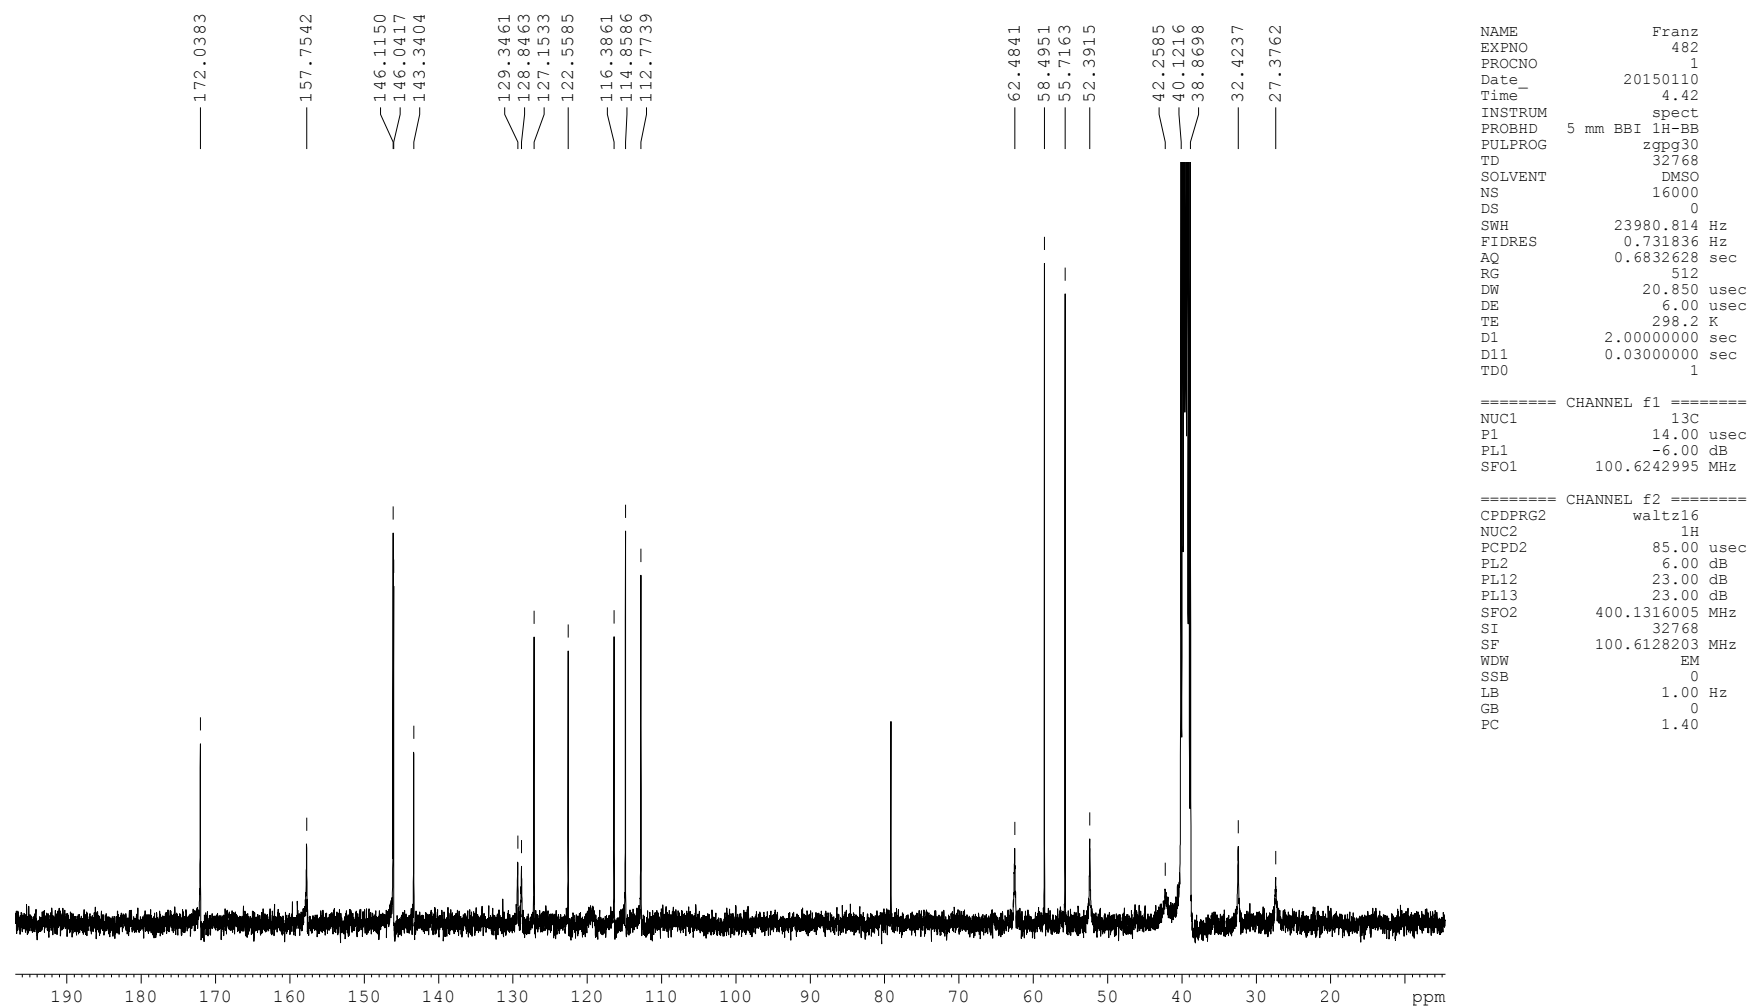

**Figure 5:**  $^1\text{H}$ -NMR spectra of  $[\text{Pt}(\text{dach})(\text{L5})]$  (**1**, top) and  $[\text{Pt}(\text{dach})(\text{L6})]$  (**2**, bottom) in  $\text{DMSO}-d_6$ .

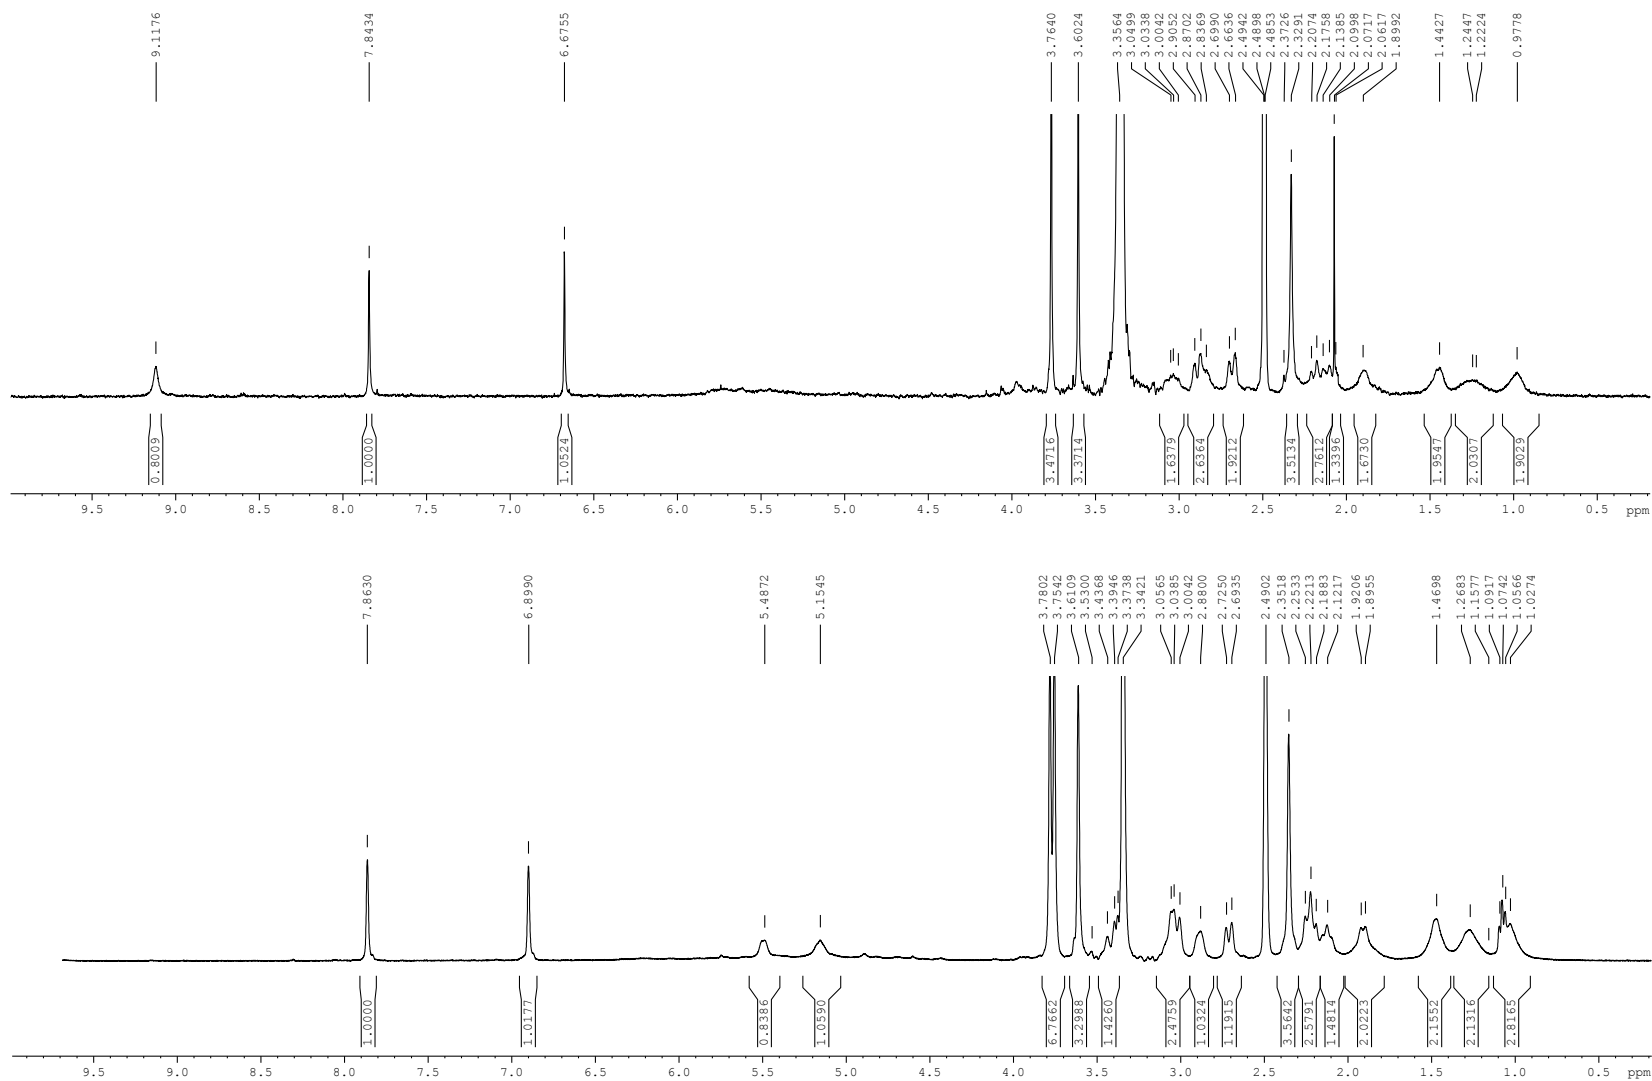

**Figure 6:** Infrared spectrum of 3-carboxyboldine (L5).

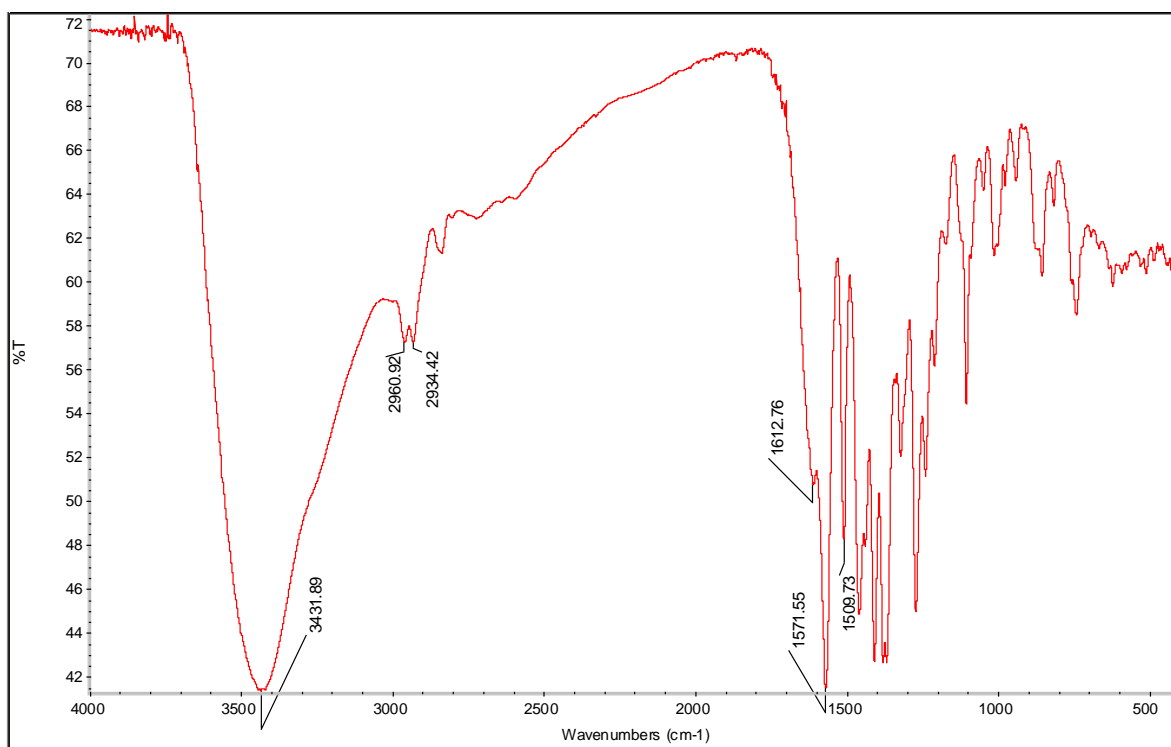

**Figure 7:** Infrared spectrum of [Pt(dach)(L5)] (1).

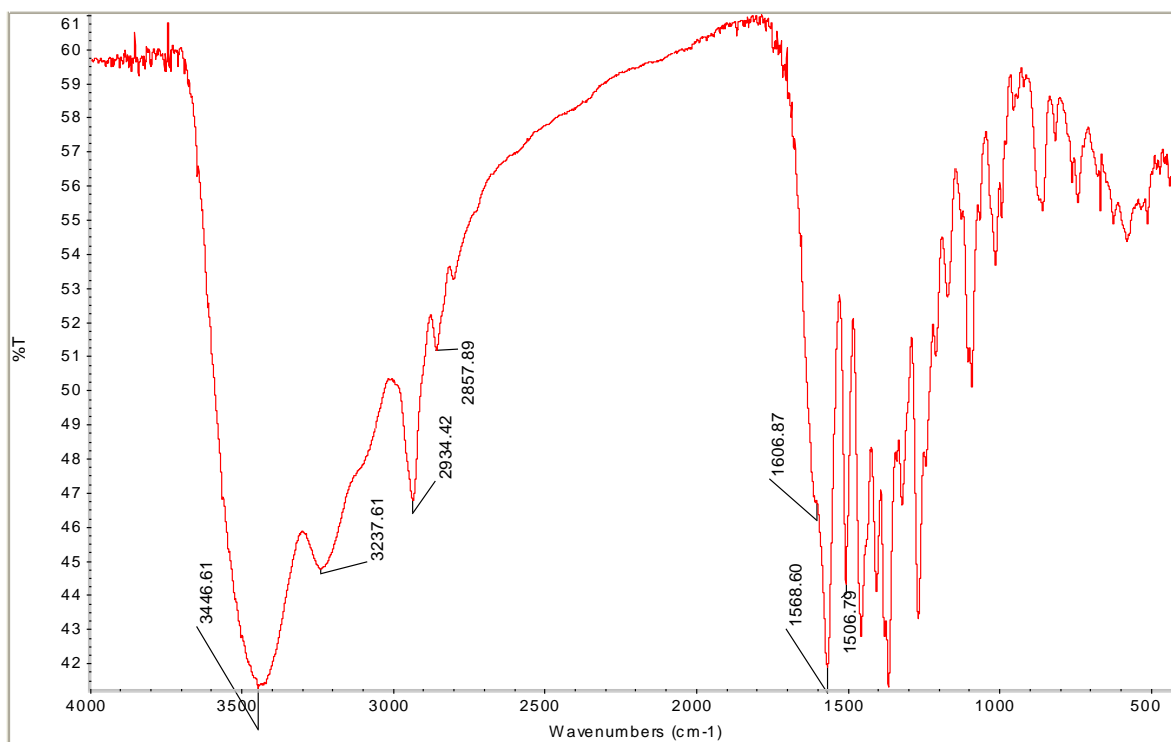

Supplement: f1 [file 920143.f1.pdf]
